# Supplementary material for: Combinatorial immunotherapy of N-803 (IL-15 superagonist) and dinutuximab with ex vivo expanded natural killer cells significantly enhances in vitro cytotoxicity against GD2+ pediatric solid tumors and in vivo survival of xenografted immunodeficient NSG mice
Source: PubMed Central journal article supplement — J Immunother Cancer. 2021 Jul 8;9(7):e002267. doi: 10.1136/jitc-2020-002267 (PMC8268924; doi:10.1136/jitc-2020-002267), 2021-07-08

**Supplementary Figure 1.**

N-803 structure:IL-15N72D:IL-15R $\alpha$ SuFc complex consisting of IL-15N72D associated with the dimeric IL-15R $\alpha$ SuFc fusion protein.

Abbreviations: IL-15, interleukin-15.

Revised from: Alter S, Rhode PR, Jeng EK, Wong HC. Targeted IL-15-based protein fusion complexes as cancer immunotherapy approaches. *J Immunol Sci* 2018;2:15-8.

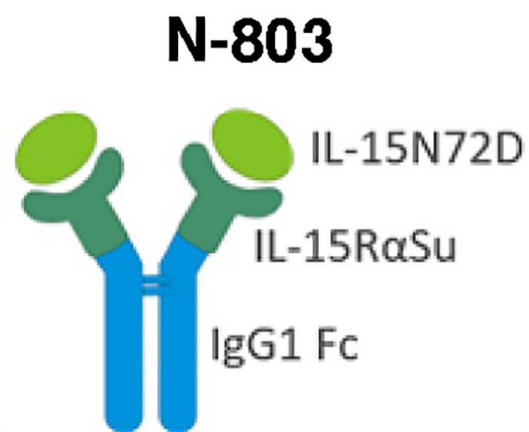

**Supplementary Figure 2.****N-803 increased the viability and proliferation of exPBNK at day 7.**

PBMNCs were stimulated with irradiated genetically modified K562-mbIL21 - 41BBL cells for 2-3 weeks. Purified exPBNK cells were cultured in complete medium with 0.35 ng/ml (low) or 3.5ng/ml (high) N-803(22) or molar equivalent dose of IgG for 7 days. NK viability and proliferation were monitored by MTS assays. The amount of 490nm absorbance is directly proportional to the number of living exPBNK cells in culture. The exPBNK cells with N-803 at 0.35 ng/ml or 3.5ng/ml have significantly higher viability compared to IgG or medium controls ( $p < 0.001$ ). And N-803 at 3.5ng/ml significantly stimulated the proliferation of exPBNK cells as compared to N-803 at 0.35ng/ml ( $p < 0.001$ ). Data were presented as mean  $\pm$  sem from 3 independent experiments.

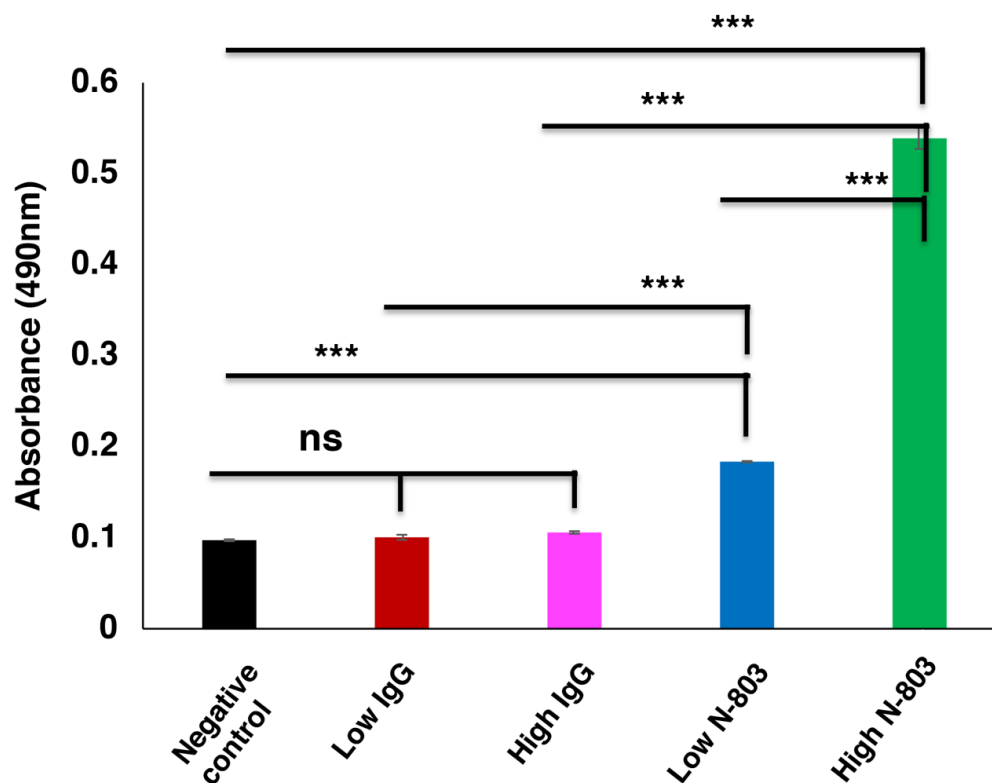

**Supplementary Figure 3.****GD2 expression on the surface of U2OS, SKNFI and M059K cells.**

U2OS, SKNFI and M059K cells were analyzed for the GD2 expression by flow cytometry. PE/Cyanine7-conjugated anti-GD2 monoclonal antibody (Biolegend, CA, USA) were used to stain the cells in the dark at 4<sup>0</sup>C for 30 minutes. After washing the cells 3 times, samples were analyzed on a MACSQuant Analyzer (Miltenyi Biotec). No stain and isotype controls were used for gating. A minimum of 10,000 events was collected and analyzed using MACSQuantify™ Software. Data were presented as mean±sem from 3 independent experiments.

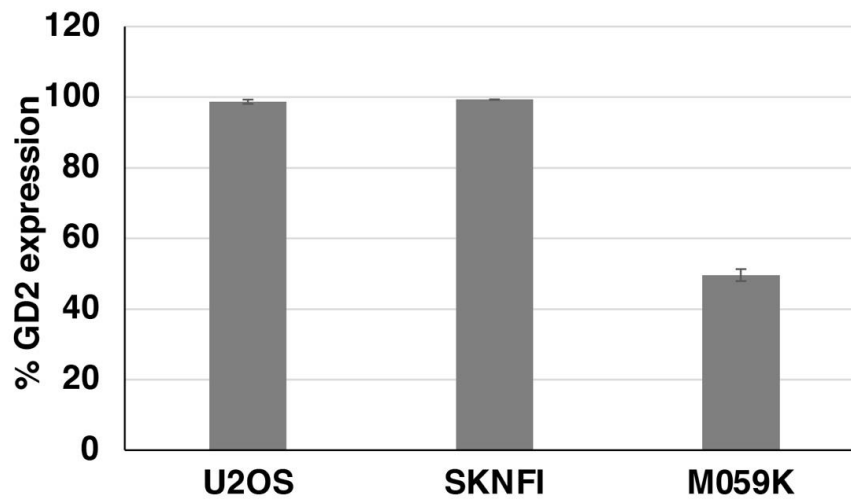

Supplement: jitc-2020-002267supp001.pdf [file jitc-2020-002267supp001.pdf]
